# Supplementary material for: Long Working and Commuting Times as Risk Factors for Depressive Symptoms: Cross-Sectional and Longitudinal Analyses
Source: PubMed Central journal article supplement — Gesundheitswesen. 2023 Nov 16;85(11):1016–26. [Article in German] doi: 10.1055/a-2090-1553 (PMC11135465; doi:10.1055/a-2090-1553), 2023-11-16
Supplement: 10-1055-a-2090-1553-2022-07-1683.pdf [file 10-1055-a-2090-1553-2022-07-1683.pdf]

Zusatzmaterial

Zusatztabellen. Online Appendix

**Zusatztabelle Ao: Untersuchungsmerkmale der Stichprobe zur Basiserhebung getrennt für Männer und Frauen (N = 3 413)**

|                                              |                                                  | N                     |                 | %                     |                 | MW (SD)           |                    | Mittlere Arbeitszeit,<br>MW (SD) |                    | Mittlere<br>Pendelzeit,MW (SD) |                   |
|----------------------------------------------|--------------------------------------------------|-----------------------|-----------------|-----------------------|-----------------|-------------------|--------------------|----------------------------------|--------------------|--------------------------------|-------------------|
| <u>GESCHLECHT</u>                            |                                                  | <u>Männ-<br/>lich</u> | <u>Weiblich</u> | <u>Männ-<br/>lich</u> | <u>Weiblich</u> | <u>Männlich</u>   | <u>Weiblich</u>    | <u>Männlich</u>                  | <u>Weiblich</u>    | <u>Männlich</u>                | <u>Weiblich</u>   |
| <u>AUSWERTBARE FÄLLE</u>                     |                                                  | <u>1 697</u>          | <u>1 716</u>    | <u>100</u>            | <u>100</u>      |                   |                    | <u>44.4 (8.5)</u>                | <u>33.4 (12.0)</u> | <u>4.2 (3.5)</u>               | <u>3.6 (2.9)</u>  |
| <u>ALTER</u>                                 | <u>31-40</u>                                     | <u>445</u>            | <u>395</u>      | <u>26</u>             | <u>23</u>       |                   |                    | <u>45.0 (9.3)</u>                | <u>34.4 (12.5)</u> | <u>4.2 (3.8)</u>               | <u>3.7 (2.9)</u>  |
|                                              | <u>41-55</u>                                     | <u>698</u>            | <u>726</u>      | <u>41</u>             | <u>42</u>       |                   |                    | <u>44.3 (7.9)</u>                | <u>32.7 (12.0)</u> | <u>4.2 (3.2)</u>               | <u>3.5 (3.0)</u>  |
|                                              | <u>56-60</u>                                     | <u>554</u>            | <u>595</u>      | <u>33</u>             | <u>35</u>       |                   |                    | <u>44.1 (8.5)</u>                | <u>33.7 (11.7)</u> | <u>4.3 (3.6)</u>               | <u>3.7 (2.9)</u>  |
| <u>BERUFLICHE POSITION</u>                   | <u>Hilfsarbeitskräfte</u>                        | <u>76</u>             | <u>130</u>      | <u>4</u>              | <u>8</u>        |                   |                    | <u>41.8 (9.3)</u>                | <u>25.2 (11.4)</u> | <u>4.1 (3.6)</u>               | <u>2.9 (2.2)</u>  |
|                                              | <u>Fachkräfte</u>                                | <u>845</u>            | <u>676</u>      | <u>50</u>             | <u>39</u>       |                   |                    | <u>43.5 (8.7)</u>                | <u>31.7 (12.1)</u> | <u>3.9 (3.3)</u>               | <u>3.2 (2.8)</u>  |
|                                              | <u>Gehobene Fachkräfte</u>                       | <u>346</u>            | <u>569</u>      | <u>20</u>             | <u>33</u>       |                   |                    | <u>43.1 (6.7)</u>                | <u>34.3 (10.5)</u> | <u>4.7 (3.6)</u>               | <u>4.0 (3.2)</u>  |
|                                              | <u>Akademische Berufe und<br/>Führungskräfte</u> | <u>430</u>            | <u>341</u>      | <u>25</u>             | <u>20</u>       |                   |                    | <u>47.6 (8.5)</u>                | <u>38.4 (12.1)</u> | <u>4.6 (3.7)</u>               | <u>4.1 (3.0)</u>  |
| <u>SKALA QUANTITATIVE<br/>ANFORDERUNGEN*</u> |                                                  |                       |                 |                       |                 | <u>2.2 (0.8)</u>  | <u>2.3 (0.8)</u>   |                                  |                    |                                |                   |
| <u>SKALA KONTROLLE*</u>                      |                                                  |                       |                 |                       |                 | <u>2.3 (0.8)</u>  | <u>2.2 (0.8)</u>   |                                  |                    |                                |                   |
|                                              |                                                  |                       |                 |                       |                 | <u>44.4 (8.5)</u> | <u>33.4 (12.0)</u> |                                  |                    |                                |                   |
| <u>WÖCHENTLICHE ARBEITSZEIT</u>              | <u>10 bis &lt; 35 Stunden</u>                    | <u>51</u>             | <u>785</u>      | <u>3</u>              | <u>46</u>       |                   |                    | <u>22.6 (7.3)</u>                | <u>22.7 (7.0)</u>  | <u>4.3 (3.0)</u>               | <u>3.2 (2.7)</u>  |
|                                              | <u>35 bis &lt; 41 Stunden</u>                    | <u>609</u>            | <u>504</u>      | <u>36</u>             | <u>29</u>       |                   |                    | <u>38.9 (1.5)</u>                | <u>38.4 (1.9)</u>  | <u>4.2 (3.3)</u>               | <u>3.8 (2.9)</u>  |
|                                              | <u>41 bis &lt; 49 Stunden</u>                    | <u>622</u>            | <u>303</u>      | <u>37</u>             | <u>18</u>       |                   |                    | <u>44.1 (2.0)</u>                | <u>43.9 (2.0)</u>  | <u>4.4 (3.7)</u>               | <u>4.2 (3.1)</u>  |
|                                              | <u>49 bis &lt; 55 Stunden</u>                    | <u>216</u>            | <u>73</u>       | <u>13</u>             | <u>4</u>        |                   |                    | <u>50.4 (1.0)</u>                | <u>50.4 (1.1)</u>  | <u>4.0 (3.5)</u>               | <u>4.0 (4.1)</u>  |
|                                              | <u>≥ 55 Stunden</u>                              | <u>199</u>            | <u>51</u>       | <u>12</u>             | <u>3</u>        |                   |                    | <u>61.1 (7.0)</u>                | <u>63.0 (8.4)</u>  | <u>4.1 (3.7)</u>               | <u>3.5 (3.3)</u>  |
|                                              |                                                  |                       |                 |                       |                 | <u>4.2 (3.5)</u>  | <u>3.6 (2.9)</u>   |                                  |                    |                                |                   |
| <u>WÖCHENTLICHE PENDELZEIT</u>               | <u>&lt; 2.5 Stunden</u>                          | <u>471</u>            | <u>600</u>      | <u>28</u>             | <u>35</u>       |                   |                    | <u>45.4 (9.1)</u>                | <u>31.1 (12.6)</u> | <u>1.2 (0.6)</u>               | <u>1.2 (0.5)</u>  |
|                                              | <u>2.5 bis &lt; 5 Stunden</u>                    | <u>635</u>            | <u>633</u>      | <u>37</u>             | <u>37</u>       |                   |                    | <u>43.9 (8.2)</u>                | <u>33.8 (11.6)</u> | <u>3.2 (0.6)</u>               | <u>3.1 (0.6)</u>  |
|                                              | <u>5 bis &lt;10 Stunden</u>                      | <u>444</u>            | <u>382</u>      | <u>26</u>             | <u>22</u>       |                   |                    | <u>43.7 (7.8)</u>                | <u>35.7 (11.2)</u> | <u>6.2 (1.3)</u>               | <u>6.1 (1.2)</u>  |
|                                              | <u>≥ 10 Stunden</u>                              | <u>147</u>            | <u>101</u>      | <u>9</u>              | <u>6</u>        |                   |                    | <u>45.5 (9.3)</u>                | <u>36.3 (10.8)</u> | <u>12.6 (4.45)</u>             | <u>11.8 (3.3)</u> |
|                                              | <u>Mittelwert†</u>                               |                       |                 | <u>=</u>              |                 | <u>4.0 (3.4)</u>  | <u>4.7 (3.6)</u>   |                                  |                    |                                |                   |

Zusatzmaterial

|                               |                          |             |             |           |           |                    |                    |                  |                  |
|-------------------------------|--------------------------|-------------|-------------|-----------|-----------|--------------------|--------------------|------------------|------------------|
| <u>DEPRESSIVE SYMPTOMATIK</u> | <u>Nein (PHQ &lt;10)</u> | <u>1589</u> | <u>1555</u> | <u>94</u> | <u>91</u> | <u>44.4 (8.3)</u>  | <u>33.1 (12.0)</u> | <u>4.2 (3.5)</u> | <u>3.6 (2.9)</u> |
| <u>(PHQ-9)</u>                | <u>Ja (PHQ ≥10)</u>      | <u>108</u>  | <u>161</u>  | <u>6</u>  | <u>9</u>  | <u>44.0 (11.0)</u> | <u>36.6 (11.4)</u> | <u>5.0 (3.9)</u> | <u>3.7 (3.1)</u> |

Alle Prozente gerundet; darum summieren sie sich nicht immer auf 100. MW = Mittelwert, SD = Standardabweichung  
\*Die Skala reicht von 0 bis 4.  
†Die Skala reicht von 0 bis 27.

Zusatzmaterial

**Zusatztabelle A1. Zusammenhänge zwischen Arbeits- und Pendelzeiten und einer depressiven Symptomatik bei 3 413 Beschäftigten im Querschnitt der S-MGA, getrennt nach Geschlecht (logistische Regression; Odds Ratios (OR) und 95% Konfidenzintervalle (KI)); Sensitivitätsanalyse**

|                                    | Männer (n = 1 697) |                                                             |       |                   |            | Frauen (n = 1 716) |                                                             |      |      |           |
|------------------------------------|--------------------|-------------------------------------------------------------|-------|-------------------|------------|--------------------|-------------------------------------------------------------|------|------|-----------|
|                                    | N                  | Prävalenz depressiver Symptomatik 2012 [ <del>in</del> (%)] | p     | OR*               | 95 % KI*   | N                  | Prävalenz depressiver Symptomatik 2012 [ <del>in</del> (%)] | p    | OR*  | 95 % KI*  |
| WÖCHENTLICHE ARBEITSZEIT (STUNDEN) |                    |                                                             | 0,001 |                   |            |                    |                                                             | ,030 |      |           |
| 10 bis < 35                        | 51                 | <del>11 (22)</del> 16                                       |       | 5,76              | 2,54;13,07 | <del>78</del> 5471 | <del>56 (7)</del> 7                                         |      | 0,65 | 0,43;0,98 |
| 35 bis < 41                        | 609                | <del>29 (5)</del> 5                                         |       | 1                 |            | <del>504</del> 309 | <del>51 (10)</del> 11                                       |      | 1    |           |
| 41 bis < 49                        | 622                | <del>41 (7)</del> 6                                         |       | 1,54              | 0,91;2,58  | <del>303</del> 182 | <del>37 (12)</del> 14                                       |      | 1,20 | 0,75;1,92 |
| 49 bis < 55                        | 216                | <del>14 (6)</del> 6                                         |       | 1,91              | 0,93;3,92  | <del>73</del> 47   | <del>10 (14)</del> 11                                       |      | 1,60 | 0,74;3,45 |
| ≥ 55                               | <del>106</del> 99  | <del>13 (7)</del> 2                                         |       | 1,80              | 0,87;3,70  | <del>51</del> 34   | <del>7 (14)</del> 21                                        |      | 1,47 | 0,59;3,64 |
| WÖCHENTLICHE PENDELZEIT (STUNDEN)  |                    |                                                             | 0,083 |                   |            |                    |                                                             | ,481 |      |           |
| < 2,5                              | <del>47</del> 1263 | <del>23 (5)</del> 4                                         |       | 1                 |            | <del>600</del> 350 | <del>52 (9)</del> 10                                        |      | 1    |           |
| 2,5 bis < 5                        | <del>635</del> 365 | <del>38 (6)</del> 6                                         |       | 1,19              | 0,69;2,07  | <del>633</del> 393 | <del>64 (10)</del> 10                                       |      | 1,15 | 0,78;1,71 |
| 5 bis < 10                         | <del>444</del> 258 | <del>31 (7)</del> 6                                         |       | 1,47              | 0,82;2,63  | <del>382</del> 240 | <del>32 (8)</del> 9                                         |      | 0,92 | 0,57;1,48 |
| ≥ 10                               | <del>147</del> 90  | <del>16 (11)</del> 17                                       |       | <del>12</del> ,40 | 1,19;4,84  | <del>101</del> 60  | <del>13 (13)</del> 12                                       |      | 1,52 | 0,77;3,00 |

\*Depressive Symptomatik zur Basiserhebung adjustiert für Alter, berufliche Position, psychosoziale Arbeitsbedingungen. Arbeits- und Pendelzeit nicht gegenseitig adjustiert.

Zusatzmaterial

**Zusatztabelle A2. Zusammenhänge zwischen Arbeits- und Pendelzeiten bei der Basiserhebung und einer depressiven Symptomatik bei der Nacherhebung von 2 019 Beschäftigten der S-MGA, getrennt nach Geschlecht (logistische Regression; Odds Ratios (OR) und 95% Konfidenzintervalle (KI)); Sensitivitätsanalyse**

|                                    | Männer (n = 976) |                                                            |       |      |           | Frauen (n = 1 043) |                                                            |      |      |           |
|------------------------------------|------------------|------------------------------------------------------------|-------|------|-----------|--------------------|------------------------------------------------------------|------|------|-----------|
|                                    | N                | Prävalenz depressiver Symptomatik 2017 <del>(in (%))</del> | p     | OR*  | 95 % KI*  | N                  | Prävalenz depressiver Symptomatik 2017 <del>(in (%))</del> | p    | OR*  | 95 % KI*  |
| WÖCHENTLICHE ARBEITSZEIT (STUNDEN) |                  |                                                            | 0,385 |      |           |                    |                                                            | ,115 |      |           |
| 10 bis < 35                        | 25               | <del>3 (12)</del> <sub>12</sub>                            |       | 1,81 | 0,46;7,07 | 471                | <del>45 (10)</del> <sub>10</sub>                           |      | 0,80 | 0,34;1,94 |
| 35 bis < 41                        | 364              | <del>23 (6)</del> <sub>6</sub>                             |       | 1    |           | 309                | <del>41 (13)</del> <sub>13</sub>                           |      | 1    |           |
| 41 bis < 49                        | 356              | <del>29 (8)</del> <sub>8</sub>                             |       | 1,62 | 0,87;3,01 | 182                | <del>28 (15)</del> <sub>15</sub>                           |      | 1,21 | 0,92;1,83 |
| 49 bis < 55                        | 125              | <del>6 (5)</del> <sub>5</sub>                              |       | 1,06 | 0,39;2,89 | 47                 | <del>9 (19)</del> <sub>19</sub>                            |      | 1,81 | 0,68;2,13 |
| ≥ 55                               | 106              | <del>8 (8)</del> <sub>8</sub>                              |       | 2,13 | 0,85;5,34 | 34                 | <del>9 (27)</del> <sub>27</sub>                            |      | 2,49 | 0,97;4,97 |
| WÖCHENTLICHE PENDELZEIT (STUNDEN)  |                  |                                                            | 0,882 |      |           |                    |                                                            | ,193 |      |           |
| < 2,5                              | 263              | <del>17 (6)</del> <sub>6</sub>                             |       | 1    |           | 350                | <del>51 (15)</del> <sub>15</sub>                           |      | 1    |           |
| 2,5 bis < 5                        | 365              | <del>26 (7)</del> <sub>7</sub>                             |       | 1,03 | 0,59;1,94 | 393                | <del>48 (12)</del> <sub>12</sub>                           |      | 0,74 | 0,46;1,17 |
| 5 bis < 10                         | 258              | <del>17 (7)</del> <sub>7</sub>                             |       | 1,00 | 0,72;1,64 | 240                | <del>29 (2)</del> <sub>2</sub>                             |      | 0,76 | 0,44;1,30 |
| ≥ 10                               | 90               | <del>8 (9)</del> <sub>9</sub>                              |       | 1,41 | 0,65;3,01 | 60                 | <del>4 (7)</del> <sub>7</sub>                              |      | 0,32 | 0,11;1,00 |

\*Depressive Symptomatik zur Nacherhebung adjustiert für depressive Symptomatik in der Basiserhebung, Alter, berufliche Position, psychosoziale Arbeitsbedingungen. Arbeits- und Pendelzeit nicht gegenseitig adjustiert.

Zusatzmaterial

**Zusatztable A3. Getrennt nach Verbleib bzw. Wechsel der Erwerbstätigkeit zur Nacherhebung: Zusammenhänge zwischen Arbeits- und Pendelzeiten bei der Basiserhebung und einer depressiven Symptomatik bei der Nacherhebung von 2 019 Beschäftigten im Längsschnitt der S-MGA (logistische Regression; Odds Ratios (OR) und 95% Konfidenzintervalle (KI)); Sensitivitätsanalyse**

| Beschäftigte, die die Erwerbstätigkeit wechselten (n = 531) |     |                                                                                                         |      |                      | Beschäftigte, die dieselbe Erwerbstätigkeit ausübten (n = 1 488) |                                                                                                      |      |                      |
|-------------------------------------------------------------|-----|---------------------------------------------------------------------------------------------------------|------|----------------------|------------------------------------------------------------------|------------------------------------------------------------------------------------------------------|------|----------------------|
|                                                             | N   | Prävalenz p <sup>†</sup><br>depressiver<br>Symptomatik <sup>‡</sup> bei<br>der Nacherhebung<br>[in (%)] | OR*  | 95 % KI <sup>*</sup> | N                                                                | Prävalenz depressiver p <sup>†</sup><br>Symptomatik <sup>‡</sup> bei der<br>Nacherhebung<br>[in (%)] | OR*  | 95 % KI <sup>*</sup> |
| ARBEITSZEIT*                                                |     | 0,292                                                                                                   |      |                      |                                                                  | 0,110                                                                                                |      |                      |
| 10 bis < 35                                                 | 138 | <del>16 (12)</del> <sub>12</sub>                                                                        | 1,62 | 0,67;3,90            | 358                                                              | <del>32 (9)</del> <sub>9</sub>                                                                       | 0,63 | 0,37;1,05            |
| 35 bis < 41                                                 | 175 | <del>13 (7)</del> <sub>7</sub>                                                                          | 1    |                      | 498                                                              | <del>50 (10)</del> <sub>10</sub>                                                                     | 1    |                      |
| 41 bis < 49                                                 | 138 | <del>14 (10)</del> <sub>10</sub>                                                                        | 1,75 | 0,71;4,32            | 400                                                              | <del>43 (11)</del> <sub>11</sub>                                                                     | 1,24 | 0,77;2,00            |
| 49 bis < 55                                                 | 38  | <del>3 (8)</del> <sub>8</sub>                                                                           | 1,21 | 0,26;5,66            | 134                                                              | <del>12 (9)</del> <sub>9</sub>                                                                       | 1,29 | 0,62;2,69            |
| ≥ 55                                                        | 42  | <del>6 (14)</del> <sub>14</sub>                                                                         | 3,93 | 1,11;13,88           | 98                                                               | <del>11 (11)</del> <sub>11</sub>                                                                     | 1,67 | 0,76;3,69            |
| PENDELZEIT*                                                 |     | 0,729                                                                                                   |      |                      |                                                                  | 0,221                                                                                                |      |                      |
| < 2,5                                                       | 164 | <del>12 (7)</del> <sub>7</sub>                                                                          | 1    |                      | 449                                                              | <del>56 (12)</del> <sub>12</sub>                                                                     | 1    |                      |
| 2,5 bis <5                                                  | 187 | <del>24 (13)</del> <sub>13</sub>                                                                        | 1,51 | 0,69;3,26            | 571                                                              | <del>50 (9)</del> <sub>9</sub>                                                                       | 0,67 | 0,43;1,04            |
| 5 bis < 10                                                  | 138 | <del>11 (8)</del> <sub>8</sub>                                                                          | 1,07 | 0,43;2,66            | 360                                                              | <del>35 (10)</del> <sub>10</sub>                                                                     | 0,78 | 0,48;1,26            |
| ≥ 10                                                        | 42  | <del>5 (12)</del> <sub>12</sub>                                                                         | 1,27 | 0,36;4,51            | 108                                                              | <del>7 (6)</del> <sub>6</sub>                                                                        | 0,52 | 0,22;1,23            |

\*Depressive Symptomatik zur Nacherhebung adjustiert für depressive Symptomatik in der Basiserhebung, Geschlecht, Alter, berufliche Position, psychosoziale Arbeitsbedingen.  
Arbeits- und Pendelzeit nicht gegenseitig adjustiert  
† Dieser p-Wert gibt in der logistischen Regression an, inwieweit die kategoriale Variable (Arbeits- oder Pendelzeit) mit selbstberichteter depressiver Symptomatik assoziiert ist.  
‡ Stunden pro Woche.

Zusatzmaterial

**Zusatztable A4. Getrennt nach beruflichem Status: Zusammenhänge zwischen Arbeits- und Pendelzeiten und einer depressiven Symptomatik bei 2 019 Beschäftigten im Querschnitt der S-MGA (logistische Regression; Odds Ratios (OR) und 95% Konfidenzintervalle (KI)); Sensitivitätsanalyse**

|                          | Fachkräfte, Hilfsarbeitskräfte (n = 940) |                                                                                      |                |      |                      | Akademische Berufe, Führungskräfte, gehobene Fachkräfte (n = 1 079) |                                                                                      |                |                 |                      |
|--------------------------|------------------------------------------|--------------------------------------------------------------------------------------|----------------|------|----------------------|---------------------------------------------------------------------|--------------------------------------------------------------------------------------|----------------|-----------------|----------------------|
|                          | N                                        | Prävalenz depressiver Symptomatik 2012<br><del>(i)</del> <u>[n (%)]</u> <sup>*</sup> | p <sup>†</sup> | OR   | 95 % KI <sup>*</sup> | N                                                                   | Prävalenz depressiver Symptomatik 2012<br><del>(i)</del> <u>[n (%)]</u> <sup>*</sup> | p <sup>†</sup> | OR <sup>*</sup> | 95 % KI <sup>*</sup> |
| ARBEITSZEIT <sup>*</sup> |                                          |                                                                                      | 0,210          |      |                      |                                                                     |                                                                                      | 0,410          |                 |                      |
| 10 bis < 35              | 464                                      | <del>42 (9)</del> <u>9</u>                                                           |                | 0,91 | 0,56;1,48            | 372                                                                 | <del>25 (7)</del> <u>7</u>                                                           |                | 0,70            | 0,39;1,24            |
| 35 bis < 41              | 611                                      | <del>47 (8)</del> <u>8</u>                                                           |                | 1    |                      | 502                                                                 | <del>33 (7)</del> <u>7</u>                                                           |                | 1               |                      |
| 41 bis < 49              | 445                                      | <del>47 (11)</del> <u>11</u>                                                         |                | 1,47 | 0,94;2,28            | 480                                                                 | <del>31 (6)</del> <u>6</u>                                                           |                | 1,05            | 0,61;1,82            |
| 49 bis < 55              | 95                                       | <del>11 (12)</del> <u>12</u>                                                         |                | 1,89 | 0,91;3,93            | 194                                                                 | <del>13 (7)</del> <u>7</u>                                                           |                | 1,30            | 0,62;2,71            |
| ≥ 55                     | 112                                      | <del>9 (8)</del> <u>8</u>                                                            |                | 1,25 | 0,57;2,73            | 138                                                                 | <del>11 (8)</del> <u>8</u>                                                           |                | 1,55            | 0,70;3,45            |
| PENDELZEIT <sup>*</sup>  |                                          |                                                                                      | 0,220          |      |                      |                                                                     |                                                                                      | 0,370          |                 |                      |
| < 2,5                    | 627                                      | <del>48 (8)</del> <u>8</u>                                                           |                | 1    |                      | 444                                                                 | <del>27 (6)</del> <u>6</u>                                                           |                | 1               |                      |
| 2,5 bis < 5              | 644                                      | <del>60 (9)</del> <u>9</u>                                                           |                | 1,24 | 0,82;1,65            | 624                                                                 | <del>42 (7)</del> <u>7</u>                                                           |                | 1,02            | 0,60;1,71            |
| 5 bis < 10               | 351                                      | <del>33 (9)</del> <u>9</u>                                                           |                | 1,29 | 0,80;2,07            | 475                                                                 | <del>30 (6)</del> <u>6</u>                                                           |                | 0,84            | 0,48;1,49            |
| ≥ 10                     | 105                                      | <del>15 (14)</del> <u>14</u>                                                         |                | 1,97 | 1,03;3,75            | 143                                                                 | <del>14 (10)</del> <u>10</u>                                                         |                | 1,59            | 0,78;3,25            |

<sup>\*</sup>Prävalenz depressiver Symptomatik bei der Basiserhebung adjustiert für Geschlecht, Alter, psychosoziale Arbeitsbedingungen. Arbeits- und Pendelzeit nicht gegenseitig adjustiert  
<sup>†</sup> Dieser p-Wert gibt in der logistischen Regression an, inwieweit die kategoriale Variable (Arbeits- oder Pendelzeit) mit selbstberichteter depressiver Symptomatik assoziiert ist.  
<sup>\*</sup> Stunden pro Woche.

Zusatzmaterial

**Zusatztable A5. Getrennt nach beruflichem Status: Zusammenhänge zwischen Arbeits- und Pendelzeiten bei der Basiserhebung und einer depressiven Symptomatik bei der Nacherhebung von 2 019 Beschäftigten im Längsschnitt der S-MGA (logistische Regression; Odds Ratios (OR) und 95% Konfidenzintervalle (KI)); Sensitivitätsanalyse**

| Fachkräfte, Hilfsarbeitskräfte (n = 940) |     |                                                                                                |                 |                     | Akademische Berufe, Führungskräfte, gehobene Fachkräfte (n = 1 079) |                                                                                                |                 |                     |  |
|------------------------------------------|-----|------------------------------------------------------------------------------------------------|-----------------|---------------------|---------------------------------------------------------------------|------------------------------------------------------------------------------------------------|-----------------|---------------------|--|
|                                          | N   | Prävalenz depressiver p <sup>†</sup> Symptomatik <sup>‡</sup> bei der Nacherhebung<br>(in (%)) | OR <sup>*</sup> | 95% KI <sup>*</sup> | N                                                                   | Prävalenz depressiver p <sup>†</sup> Symptomatik <sup>‡</sup> bei der Nacherhebung<br>(in (%)) | OR <sup>*</sup> | 95% KI <sup>*</sup> |  |
| ARBEITSZEIT <sup>*</sup>                 |     |                                                                                                | 0,487           |                     |                                                                     |                                                                                                | 0,055           |                     |  |
| 10 bis < 34                              | 246 | 23 (9)9                                                                                        | 1,24            | 0,52;2,4            | 250                                                                 | 25 (10)10                                                                                      | 0,62            | 0,34;1,13           |  |
| 35 bis < 41                              | 357 | 28 (8)8                                                                                        | 1               |                     | 316                                                                 | 35 (11)11                                                                                      | 1               |                     |  |
| 41 bis < 49                              | 230 | 29 (13)13                                                                                      | 1,78            | 0,97;3,27           | 308                                                                 | 28 (9)9                                                                                        | 1,12            | 0,62;2,01           |  |
| 49 bis < 55                              | 52  | 5 (10)10                                                                                       | 1,45            | 0,47;4,5            | 120                                                                 | 10 (8)8                                                                                        | 1,12            | 0,49;2,54           |  |
| ≥ 55                                     | 55  | 4 (7)7                                                                                         | 1,36            | 0,43;4,3            | 85                                                                  | 13 (15)15                                                                                      | 2,47            | 1,07;5,71           |  |
| PENDELZEIT <sup>‡</sup>                  |     |                                                                                                | 0,786           |                     |                                                                     |                                                                                                | 0,692           |                     |  |
| < 2,5                                    | 334 | 35 (10)10                                                                                      | 1               |                     | 449                                                                 | 33 (12)12                                                                                      | 1               |                     |  |
| 2,5 bis < 5                              | 359 | 31 (9)9                                                                                        | 0,75            | 0,43;1,31           | 571                                                                 | 43 (9)9                                                                                        | 0,86            | 0,51;1,45           |  |
| 5 bis < 10                               | 191 | 18 (9)9                                                                                        | 0,92            | 0,48;1,75           | 360                                                                 | 28 (10)10                                                                                      | 0,77            | 0,43;1,36           |  |
| ≥ 10                                     | 56  | 5 (9)9                                                                                         | 0,79            | 0,27;2,31           | 108                                                                 | 7 (6)6                                                                                         | 0,62            | 0,25;1,54           |  |

\*Depressive Symptomatik zur Nacherhebung adjustiert für depressive Symptomatik in der Basiserhebung, Geschlecht, Alter, psychosoziale Arbeitsbedingungen. Arbeits- und Pendelzeit nicht gegenseitig adjustiert  
† Dieser p-Wert gibt in der logistischen Regression an, inwieweit die kategoriale Variable (Arbeits- oder Pendelzeit) mit selbstberichteter depressiver Symptomatik assoziiert ist.  
‡ Stunden pro Woche.

Zusatzmaterial

Zusatztable A6: Zusammenhänge (Längsschnitt) zwischen Arbeits- und Pendelzeiten zur Basiserhebung und einer depressiven Symptomatik bei der Nacherhebung bei 1 861 Beschäftigten der S-MAGA ohne eine depressive Symptomatik zur Basiserhebung (logistische Regression; Odds Ratios (OR) und 95% Konfidenzintervalle (KI))

|               | N                   | Depressive Symptomatik bei der Nacherhebung | Modell 1<br>nur Arbeitszeit oder nur Pendelzeit | Modell 2<br>+ Kontrolle für depressive Symptomatik zur Basiserhebung | Modell 3<br>+ Kontrolle für Alter und Geschlecht | Modell 4<br>+ Kontrolle für berufl. Pos., psychosoz. Arbeitsbed. |       |           |               |       |           |               |       |           |
|---------------|---------------------|---------------------------------------------|-------------------------------------------------|----------------------------------------------------------------------|--------------------------------------------------|------------------------------------------------------------------|-------|-----------|---------------|-------|-----------|---------------|-------|-----------|
|               | Prävalenz*<br>n (%) | Mittelwert (PHQ-9; MW, SD)                  | Nagelkerke R²                                   | OR                                                                   | 95 % KI                                          | Nagelkerke R²                                                    | OR    | 95 % KI   | Nagelkerke R² | OR    | 95 % KI   | Nagelkerke R² | OR    | 95 % KI   |
| ARBEITSZEIT‡  |                     |                                             | 0.001                                           | 0.811                                                                |                                                  | 0.147                                                            | 0.745 |           | 0.171         | 0.155 |           | 0.041         | 0.258 |           |
| 10 bis < 35   | 427                 | 7 (33) 4.4 (3.4)                            |                                                 | 1.04                                                                 | 0.70;1.54                                        |                                                                  | 1.08  | 0.71;1.64 |               | 0.83  | 0.53;1.28 |               | 0.73  | 0.44;1.21 |
| 35 bis < 41   | 576                 | 7 (43) 4.3 (3.3)                            |                                                 | 1                                                                    |                                                  |                                                                  | 1     |           |               | 1     |           |               | 1     |           |
| 41 bis < 49   | 456                 | 7 (35) 4.1 (3.4)                            |                                                 | 1.15                                                                 | 0.79;1.67                                        |                                                                  | 1.13  | 0.76;1.69 |               | 1.28  | 0.85;1.93 |               | 1.17  | 0.73;1.89 |
| 49 bis < 55   | 152                 | 5 (8) 3.5 (2.9)                             |                                                 | 0.92                                                                 | 0.51;1.67                                        |                                                                  | 0.96  | 0.52;1.80 |               | 1.13  | 0.60;2.13 |               | 0.90  | 0.40;2.01 |
| ≥ 55 Stunden  | 120                 | 8 (11) 4.0 (3.6)                            |                                                 | 1.34                                                                 | 0.76;2.37                                        |                                                                  | 1.49  | 0.82;2.73 |               | 1.82  | 0.97;3.38 |               | 1.75  | 0.84;3.65 |
| PENDELZEIT‡   |                     |                                             | 0.002                                           | 0.607                                                                |                                                  | 0.148                                                            | 0.507 |           | 0.166         | 0.755 |           | 0.037         | 0.536 |           |
| < 2.5 Stunden | 521                 | 8 (45) 4.2 (3.2)                            |                                                 | 1                                                                    |                                                  |                                                                  |       |           |               | 1     |           |               | 1     |           |
| 2.5 bis < 5   | 648                 | 7 (49) 4.2 (3.5)                            |                                                 | 0.87                                                                 | 0.61;1.23                                        |                                                                  | 0.83  | 0.58;1.21 |               | 0.87  | 0.60;1.27 |               | 0.86  | 0.56;1.32 |
| 5 bis < 10    | 431                 | 7 (30) 4.2 (3.4)                            |                                                 | 0.82                                                                 | 0.55;1.21                                        |                                                                  | 0.80  | 0.53;1.22 |               | 0.86  | 0.56;1.31 |               | 0.80  | 0.49;1.29 |
| ≥ 10 Stunden  | 131                 | 4 (6) 4.1 (3.0)                             |                                                 | 0.70                                                                 | 0.37;1.32                                        |                                                                  | 0.63  | 0.32;1.25 |               | 0.72  | 0.36;1.43 |               | 0.55  | 0.22;1.33 |

PHQ-9 = Patient Health Questionnaire; MW=Mittelwert; SD=Standardabweichung; OR = Odds Ratio; KI = Konfidenzintervall

\*PHQ-9 Wert zur Nachuntersuchung >10

‡ Stunden pro Woche.
